# Supplementary material
Source: Springer Nature journal article supplement (https://www.springermedizin.de/resource/supplementary/12885_2010_2560_MOESM12_ESM.pdf/9462550)

*SCNN1A*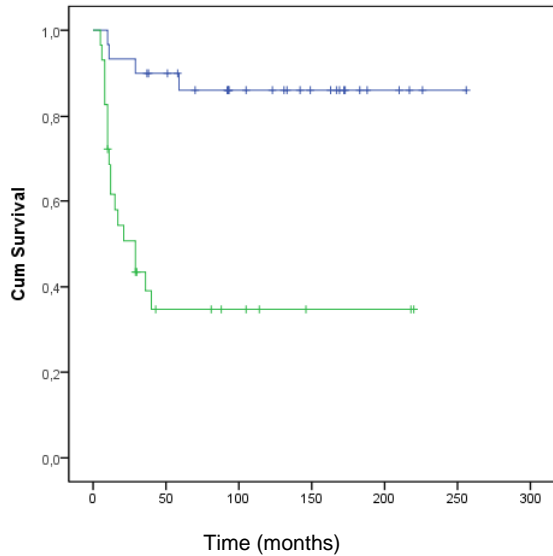*KRT19*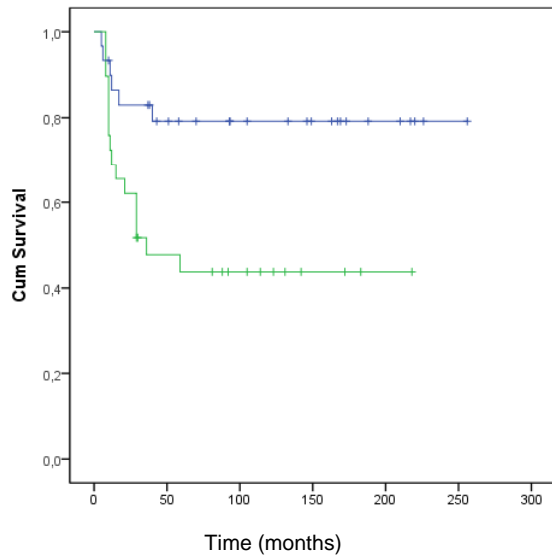*PRKCDBP*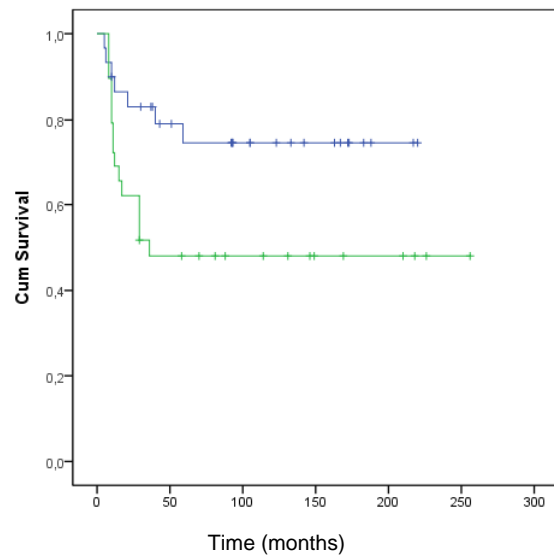

Supplement: MOESM12 [file 9462550]
